# Supplementary material for: Reduction in Multiple Cardiometabolic Risk Factors With Combined Olanzapine/Samidorphan Compared With Olanzapine: Post Hoc Analyses From a 24-Week Phase 3 Study
Source: PubMed Central journal article supplement — Schizophr Bull. 2022 Oct 28;49(2):454–63. doi: 10.1093/schbul/sbac144 (PMC10016392; doi:10.1093/schbul/sbac144), 2022-10-28
Supplement: sbac144_suppl_supplementary_material.pdf [file sbac144_suppl_supplementary_material.pdf]

## SUPPLEMENTARY MATERIAL

### Supplementary Table 1. Metabolic Syndrome Diagnosis Requires the Presence of 3 or More Component Criteria<sup>1</sup>

| Parameter               | Component                   |
|-------------------------|-----------------------------|
| Waist circumference, cm | ≥88 (females), ≥102 (males) |
| Triglycerides, mg/dL    | ≥150                        |
| HDL cholesterol, mg/dL  | <50 (females), <40 (males)  |
| Glucose, mg/dL          | ≥100                        |
| Blood pressure, mm Hg   | ≥130/85                     |

HDL, high-density lipoprotein.

## REFERENCE

1. Grundy SM, Cleeman JI, Daniels SR, et al. Diagnosis and management of the metabolic syndrome: an American Heart Association/National Heart, Lung, and Blood Institute scientific statement. *Circulation*. 2005;112(17):2735-2752.
